# Supplementary material
Source: publisher figshare collection journal article supplement (https://acs.figshare.com/ndownloader/files/3976246)
Supplement: Supplementary file 1 [file 3976246]

## Supporting Information

### Formation and structural characteristics of thermosensitive multiblock copolymer vesicles

Shiying Ma<sup>a,b</sup>, Mengying Xiao<sup>a</sup>, Rong Wang<sup>\*,a</sup>

<sup>a</sup> Department of Polymer Science and Engineering, State Key Laboratory of  
Coordination Chemistry, School of Chemistry and Chemical Engineering, Nanjing  
National Laboratory of Microstructures, Nanjing University, Nanjing 210093, China

<sup>b</sup> College of Chemistry and Chemical Engineering, Taishan University, Taian 271021,  
China

Email: wangrong@nju.edu.cn

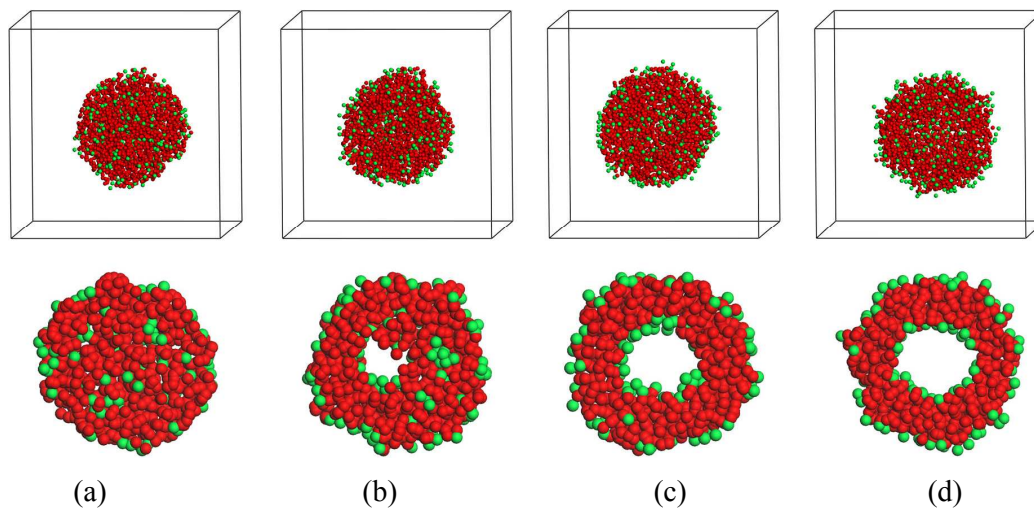

**Figure S1** Snapshots showing the aggregates formed by  $A_1B_{10}A_1B_{10}A_1$  multiblock copolymers with  $a_{BS} = 75$  at  $t = 12000\tau$  (a),  $18000\tau$  (b),  $24000\tau$  (c) and  $27000\tau$  (d). Note that the interaction parameter  $a_{AS}$  is started with 75 for the first  $4 \times 10^5$  steps and then decreased to 25 with decreasing

rate  $\Delta a_{AS} = -1.0 \times 10^{-4}$  per DPD step, that is, the  $a_{AS}$  is 75(a), 55(b), 35(c), and 25(d), respectively.

For a better understanding, the enlarged slices of aggregates are also given. The hydrophilic and hydrophobic beads are marked in green and red, respectively.

**Table S1** Summary of the vesicle sizes, cavity sizes and corresponding wall thicknesses with various interaction parameter  $a_{AS}$  with fixed  $a_{BS} = 75$  at equilibrium states obtained from the multi-block copolymer  $A_1B_8A_1B_8A_1$ .

| $a_{AS}$ | $R_{in}$ | $d$  | $R_{out}$ |
|----------|----------|------|-----------|
| 15       | 2.07     | 3.69 | 6.45      |
| 20       | 2.03     | 3.77 | 6.38      |
| 25       | 1.85     | 3.82 | 6.37      |
| 30       | 2.02     | 3.75 | 6.34      |
| 35       | 1.87     | 3.89 | 6.20      |
| 40       | 1.81     | 3.89 | 6.16      |
| 45       | 1.78     | 4.05 | 6.16      |
| 50       | 1.65     | 4.14 | 6.10      |
| 55       | 1.26     | 4.54 | 6.04      |
| 60       | 1.28     | 4.53 | 6.06      |

**Table S2** Summary of the vesicle sizes and cavity sizes with different B-block length for multi-block copolymer  $(A_1B_nA_1B_nA_1)$  with  $a_{AS} = 25$  and  $a_{BS} = 75$ .

| sample                  | $R_{in}$ | $R_{out}$ |
|-------------------------|----------|-----------|
| $A_1B_4A_1B_4A_1$       | 2.32     | 6.63      |
| $A_1B_6A_1B_6A_1$       | 2.12     | 6.45      |
| $A_1B_8A_1B_8A_1$       | 1.85     | 6.37      |
| $A_1B_{10}A_1B_{10}A_1$ | 1.90     | 6.26      |
| $A_1B_{12}A_1B_{12}A_1$ | 1.65     | 6.29      |
| $A_1B_{14}A_1B_{14}A_1$ | 1.50     | 6.13      |

**Table S3** Summary of the vesicle sizes and cavity sizes with different A-block length for multi-block copolymer ( $A_m B_8 A_m B_8 A_m$ ) with  $a_{AS} = 25$  and  $a_{BS} = 75$ .

| sample                | $R_{in}$ | $R_{out}$ |
|-----------------------|----------|-----------|
| $A_1 B_8 A_1 B_8 A_1$ | 1.85     | 6.37      |
| $A_2 B_8 A_2 B_8 A_2$ | 1.86     | 6.28      |
| $A_3 B_8 A_3 B_8 A_3$ | 1.46     | 6.32      |
| $A_4 B_8 A_4 B_8 A_4$ | 1.07     | 6.33      |
